# Supplementary material for: Real-Time Fast Amyloid Seeding and Translocation of α-Synuclein with a Nanopipette
Source: PubMed Central journal article supplement — ACS Cent Sci. 2022 Feb 23;8(4):441–8. doi: 10.1021/acscentsci.1c01404 (PMC9052795; doi:10.1021/acscentsci.1c01404), 2022-02-23
Supplement: oc1c01404_si_001.pdf [file oc1c01404_si_001.pdf]

# Supporting information

## Real-Time Fast Amyloid Seeding and Translocation (RT-FaST) of $\alpha$ -synuclein using nanopipette

*Nathan Meyer<sup>a,b</sup>, Jean-Marc Janot<sup>a</sup>, Joan Torrent<sup>b</sup>, Sébastien Balme<sup>a\*</sup>*

<sup>a</sup> Institut Européen des Membranes, UMR5635 University of Montpellier ENCSM CNRS,  
Place Eugène Bataillon, 34095 Montpellier cedex 5, France.

<sup>b</sup> INM, University of Montpellier , INSERM, Montpellier, France

\* Corresponding author : [sebastien.balme@umontpellier.fr](mailto:sebastien.balme@umontpellier.fr)

### Table of content

|                                                                                        |    |
|----------------------------------------------------------------------------------------|----|
| 1. Characterization of Nanopipettes .....                                              | S2 |
| 2. Characterization of $\alpha$ -synuclein seeds after 180 min incubation at 37°C..... | S4 |
| 3. Additional results for RT-FAST .....                                                | S5 |



## 1. Characterization of Nanopipettes

Table SI-1 : List of nanopipettes used in this work

| Pipette number | Experiments         | Current at V= 500 mV<br>(nA ) | Conductance at NaCl 1M<br>(after L-Dopa coating, nA/V) |
|----------------|---------------------|-------------------------------|--------------------------------------------------------|
| 1              | Control             | 2                             | 2.83                                                   |
| 2              | Control             | 3                             | 1.26                                                   |
| 3              | Control             | 0.9                           | 1.16                                                   |
| 4              | Control             | 1.5                           | 1.2                                                    |
| 5              | Control             | 2.3                           | 1.92                                                   |
| 6              | Control             | 2.3                           | 1.77                                                   |
| 7              | Control             | 1.3                           | 1.72                                                   |
| 8              | seeds WT (200 pM)   |                               |                                                        |
| 9              | seeds WT (200 pM)   | 2.75                          | 1.52                                                   |
| 10             | Seeds WT (200 pM)   | 0.9                           |                                                        |
| 11             | seeds WT (200 pM)   | 0.8                           | 4.45                                                   |
| 12             | seeds WT (200 pM)   | 0.8                           | 1.93                                                   |
| 13             | Seeds A53T (200 pM) | 1                             | 0.93                                                   |
| 14             | seeds A53T (200 pM) | 1.20                          | 886                                                    |
| 15             | seeds A53T (200 pM) | 0.8                           | 1.27                                                   |
| 16             | Seeds A53T (200 pM) | 1.5                           | 1.23                                                   |
| 17             | seeds WtT (20 pM)   | 1.25                          | 1.59                                                   |
| 18             | seeds WtT (20 pM)   | 1                             | 1.08                                                   |
| 19             | seeds WtT (20 pM)   | 0.6                           | 2.96                                                   |
| 20             | seeds WtT (2 pM)    | 1.1                           | 1.42                                                   |
| 21             | seeds WtT (2 pM)    | 1.1                           | 1.25                                                   |
| 22             | seeds WtT (2 pM)    |                               | 1.15                                                   |
| 23             | seeds WtT (2 pM)    | 2.65                          | 0.86                                                   |

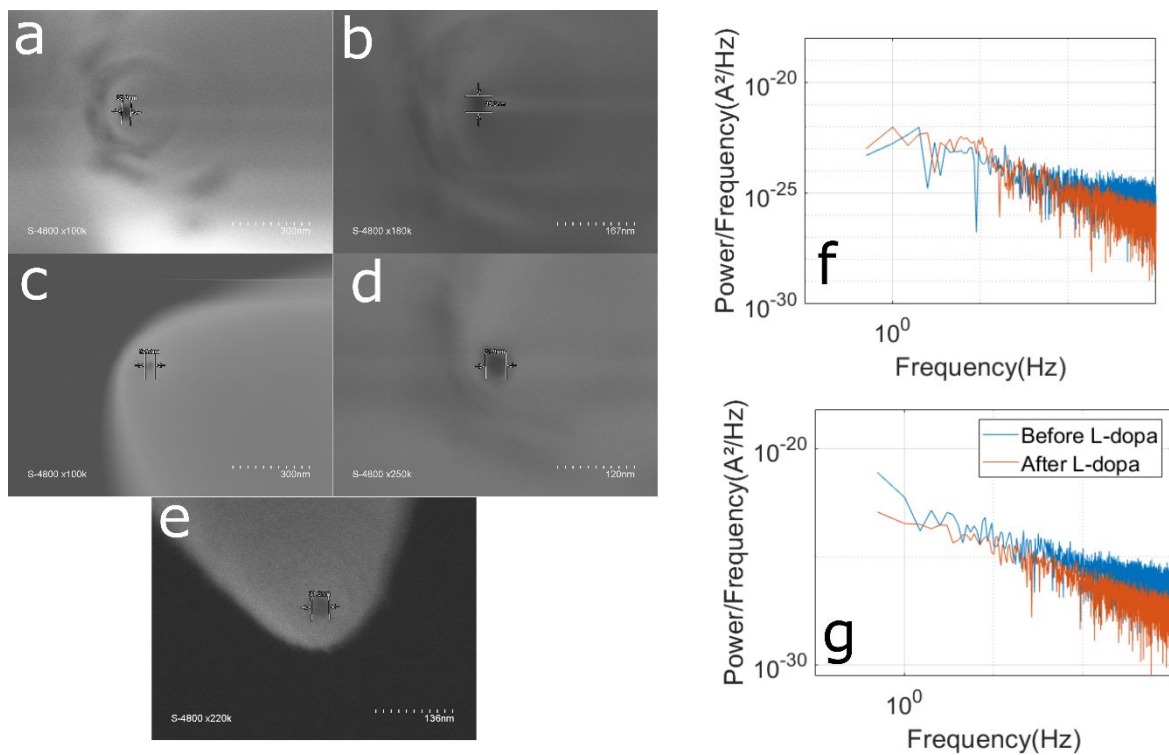

Figure SI-1: MEB images of the tip aperture of five individual nanopipettes show a diameter of (a) 36 nm (b) 35 nm, (c) 38 nm, (d) 32 nm and (e) 32 nm. (f-g) power spectral density of the nanopipette recorded before and after coating with L-DOPA.

## 2. Characterization of $\alpha$ -synuclein seeds after 180 min incubation at 37°C

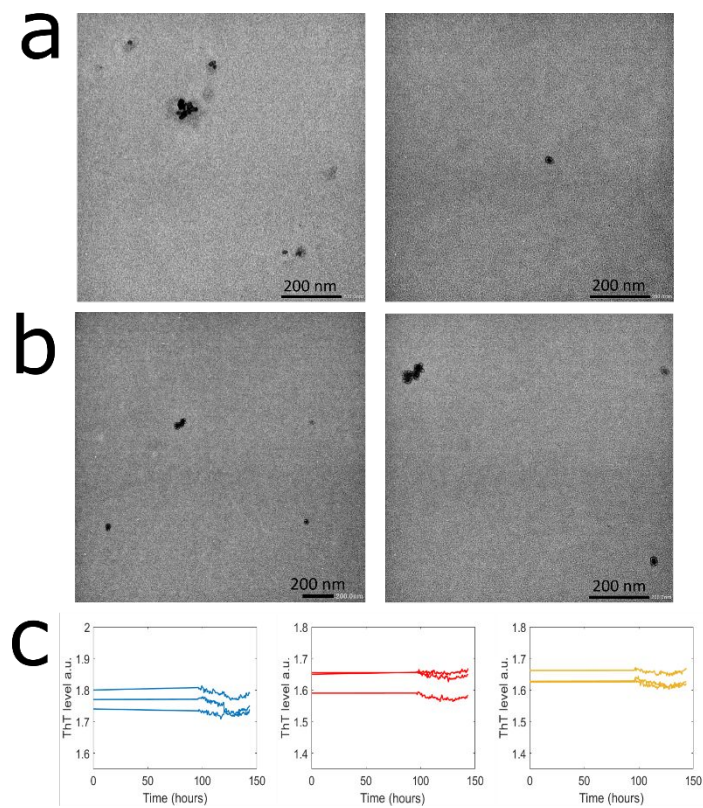

Figure SI-2: TEM images of  $\alpha$ -synuclein aggregates WT (a) and A53T (b) used for the seeding in nanopipettes. (c) Kinetic characterization of  $\alpha$ -synuclein aggregation at 4  $\mu$ M 37° C without (blue) and with WT (red) and A53T (yellow) seeds obtained using ThT intercalation. Here, the result does not allow evidencing the presence of  $\beta$ -sheet structure.

### 3. Additional results for RT-FAST

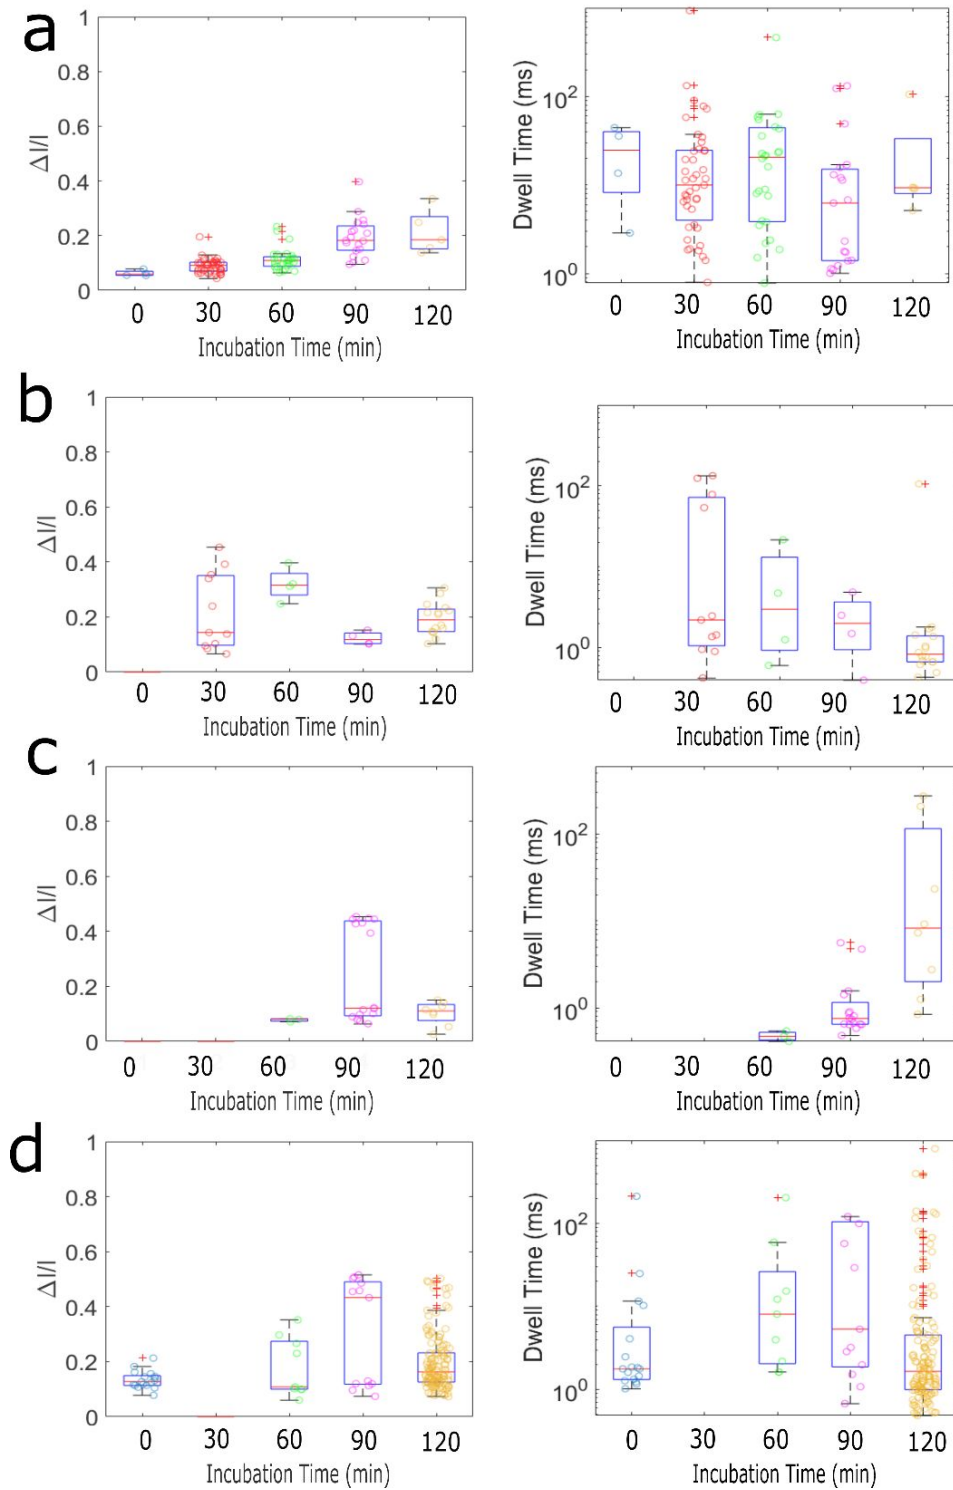

Figure SI-3 : Distribution of amplitude of the current blockade (right) and dwell time (left) recorded for the control as function of incubation time at  $T = 25\text{ °C} \pm 2\text{ °C}$ . The experiments were performed at  $V = 500\text{ mV}$  in  $\text{NaCl } 1\text{M}$ ,  $\text{PBS } 1\text{X}$  pH 7.4,  $T = 25\text{ °C}$  using (a) pipette N°4, (b) nanopipette N°5, (c) nanopipette N°6 and (d) nanopipette N°7.

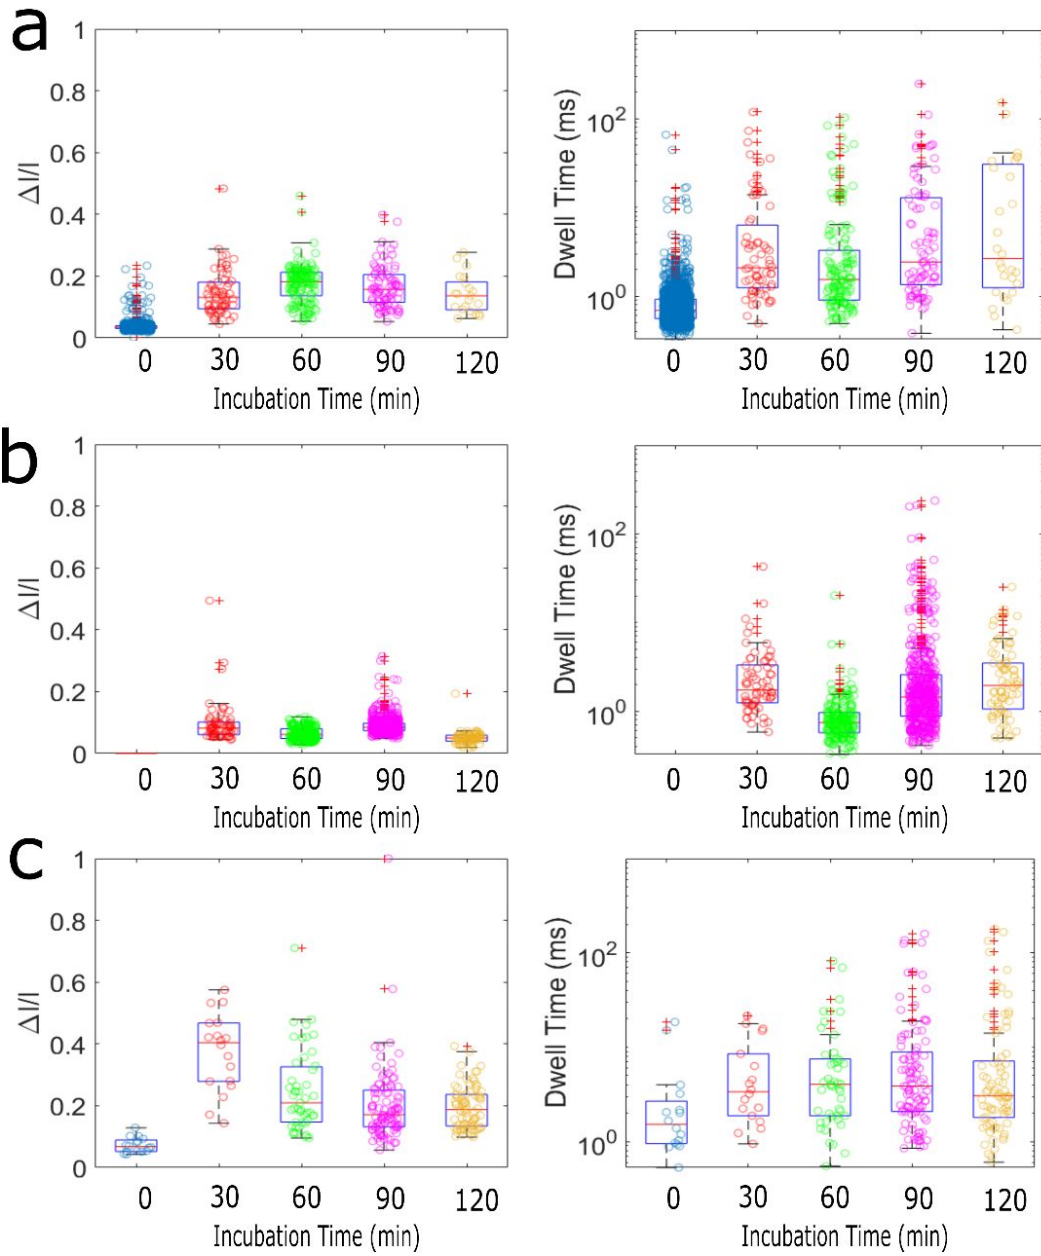

Figure SI-4: Distribution of amplitude of current blockade (right) and dwell time (left) recorded for the control as function of incubation time at  $T = 30^\circ\text{C}$ . The experiments were performed at  $V = 500 \text{ mV}$  in  $\text{NaCl } 1\text{M}$ ,  $\text{PBS } 1\text{X}$  ph 7.4, using (a) pipette N°7, (b) nanopipette N°2 and (c) nanopipette N°1

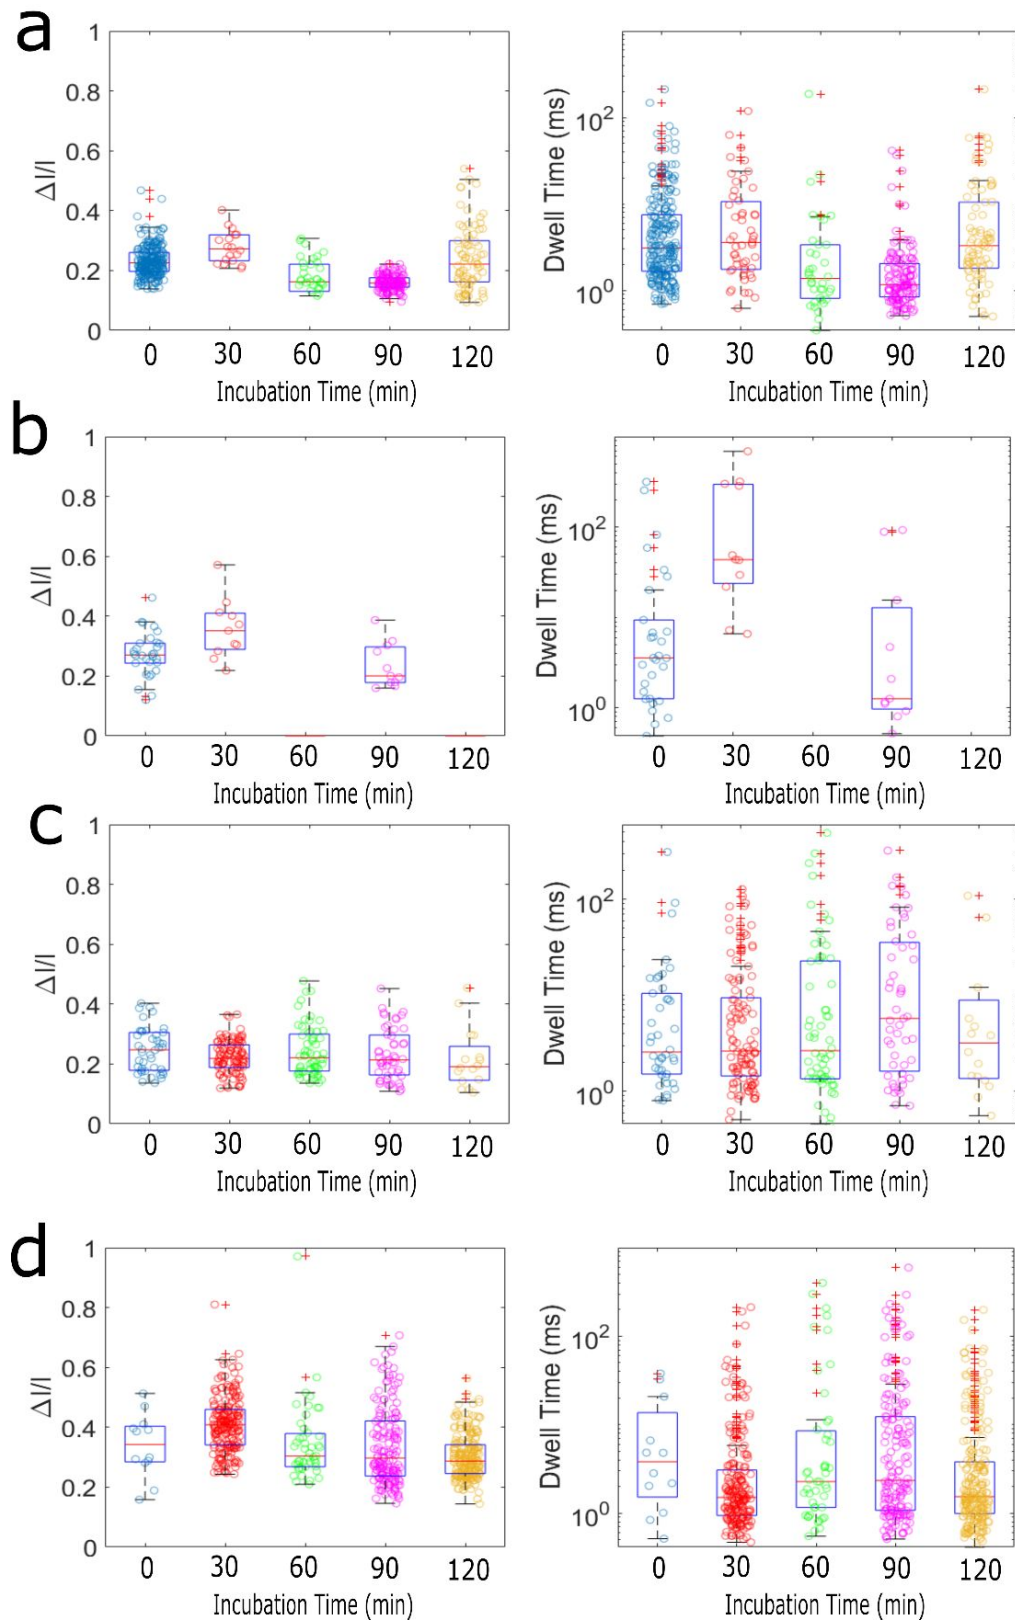

Figure SI-5: Distribution of amplitude of the current blockade (right) and dwell time (left) recorded for the sample seeded with 200 pM of  $\alpha$ -synuclein WT as function of incubation time. The experiments were performed at  $V = 500$  mV in NaCl 1M, PBS 1X pH 7.4, using (a) pipette N°9, (b) nanopipette N°10, (c) nanopipette N°11 and (d) nanopipette N°12.



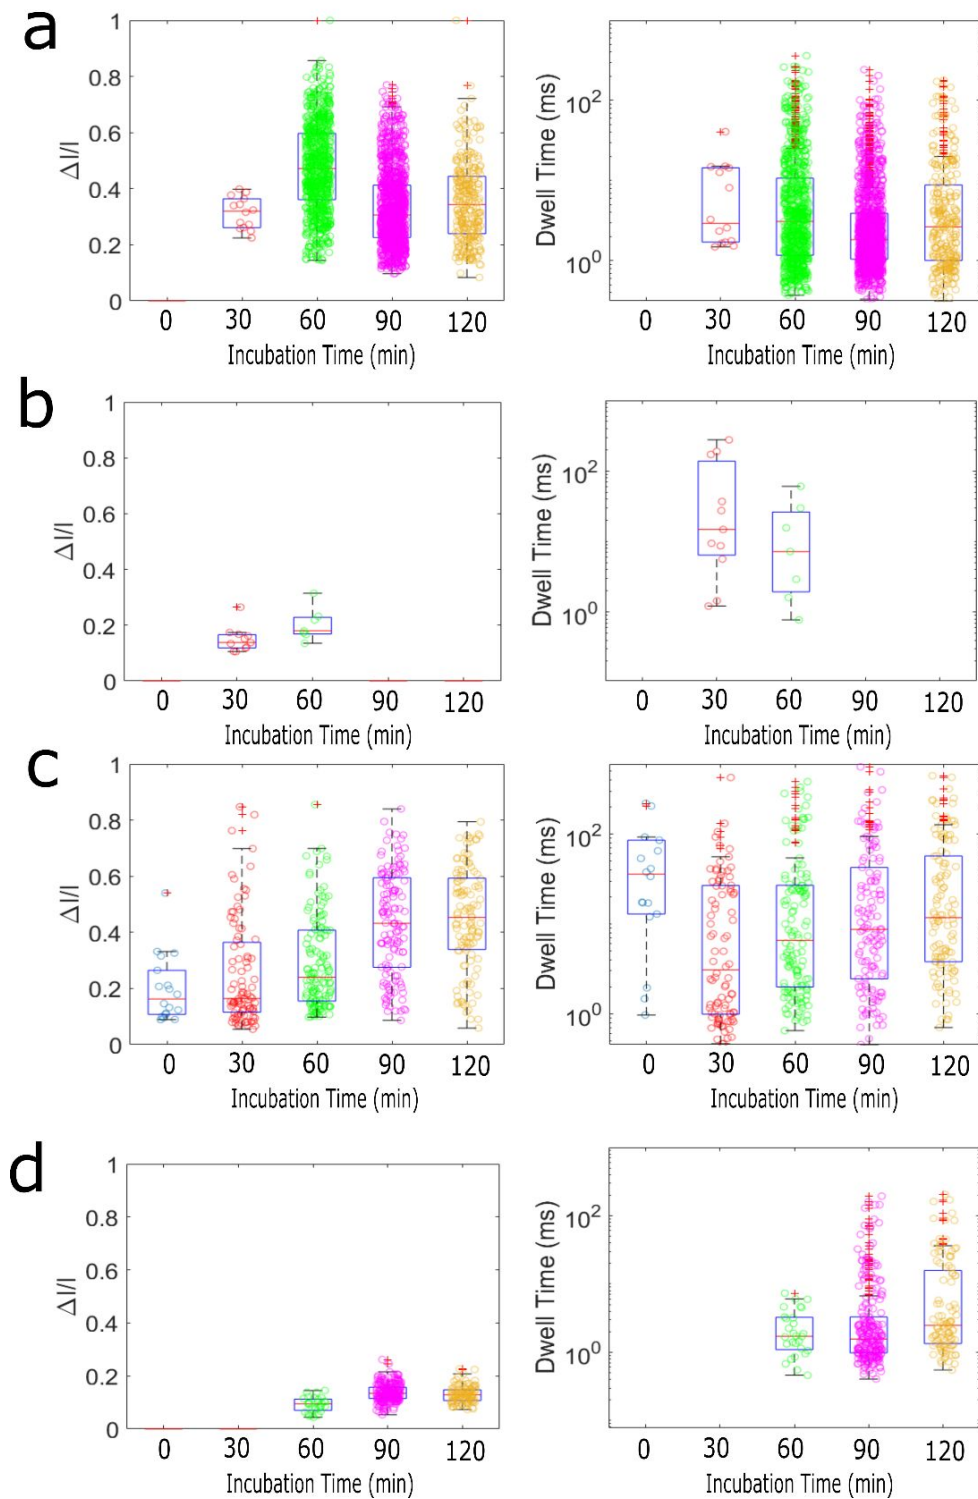

Figure SI-6: Distribution of amplitude of the current blockade (right) and dwell time (left) recorded for the sample seeded with 200 pM of  $\alpha$ -synuclein A53T as function of incubation time. The experiments were performed at  $V= 500$  mV in NaCl 1M, PBS 1X ph 7.4, using (a) pipette N°13, (b) nanopipette N°14, (c) nanopipette N°15 and (d) nanopipette N°16.

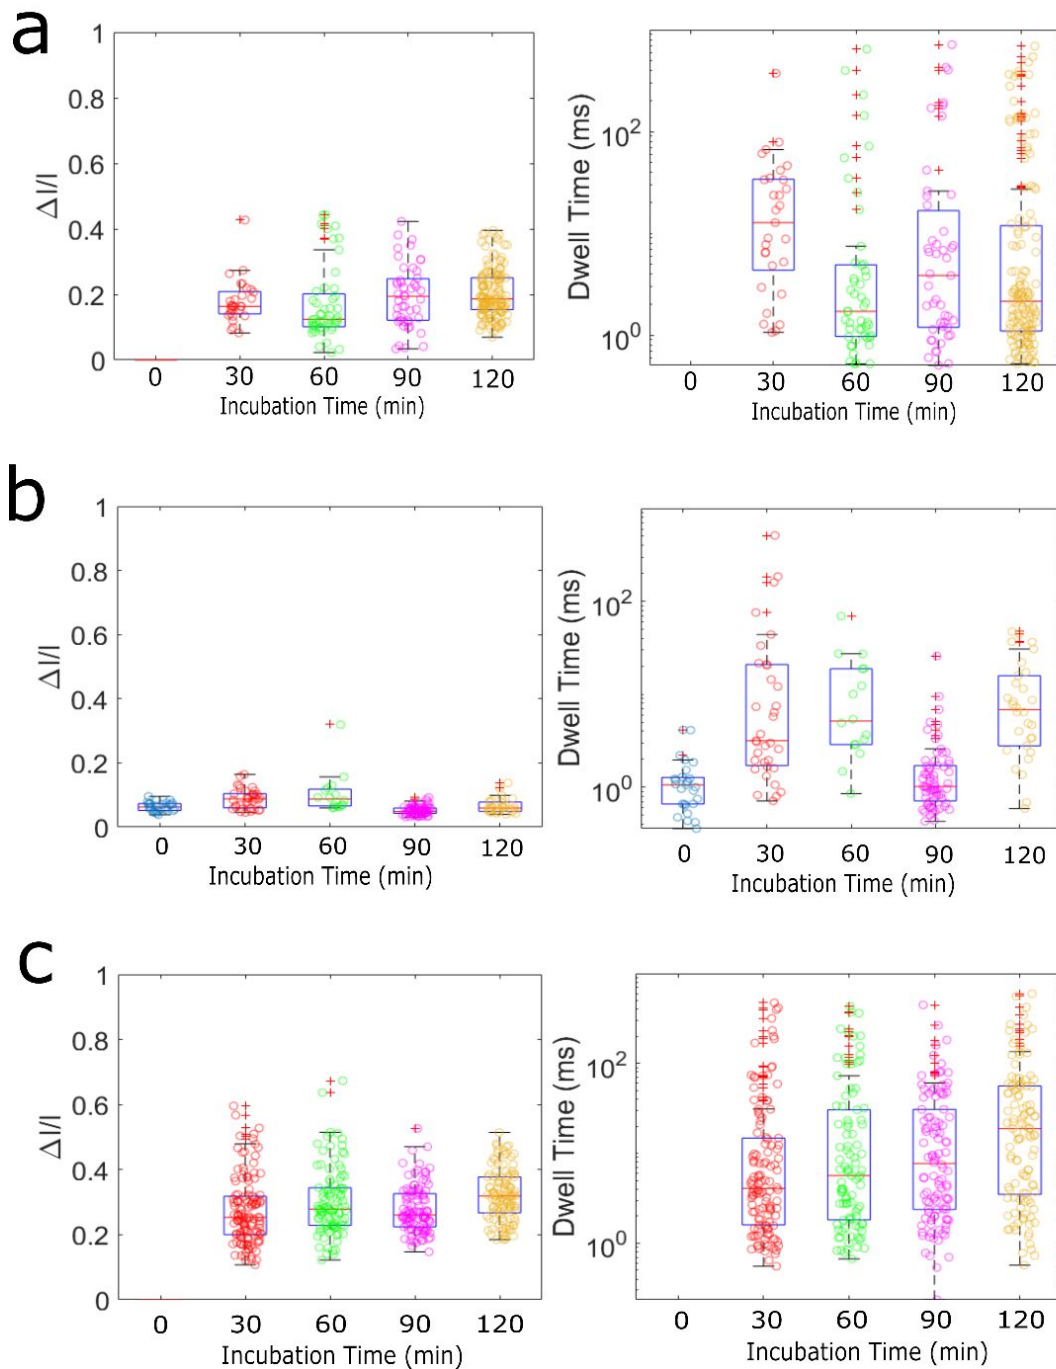

Figure SI-7: Distribution of amplitude of current blockade (right) and dwell time (left) recorded for the sample seeded with 20 pM of  $\alpha$ -synuclein WT as function of incubation time. The experiments were performed at  $V= 500$  mV in NaCl 1M, PBS 1X ph 7.4, using (a) pipette N°17, (b) nanopipette N°18 and (c) nanopipette N°19

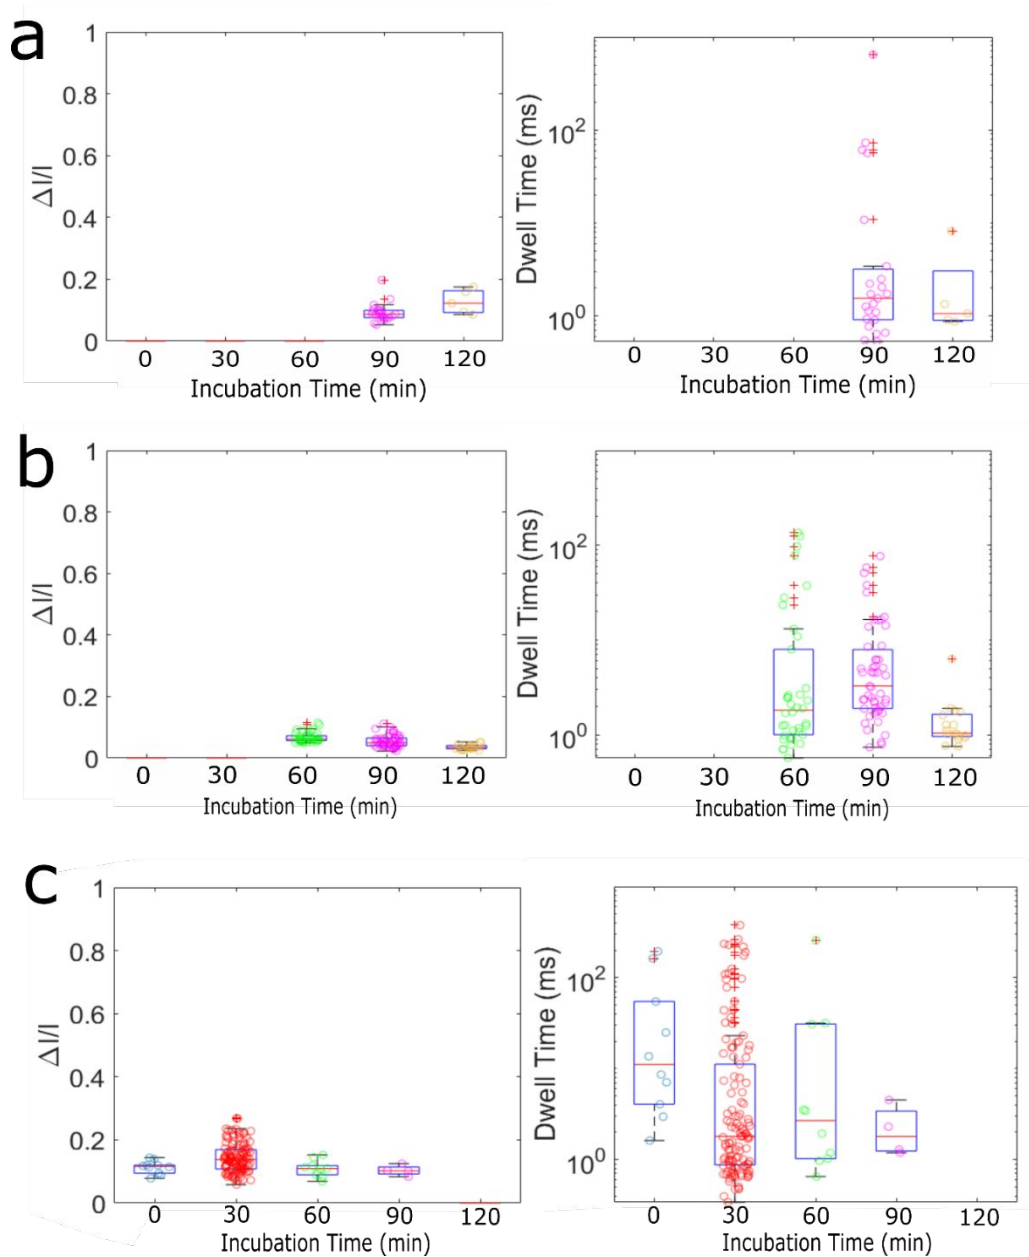

Figure SI-8: Distribution of amplitude of current blockade (right) and dwell time (left) recorded for the sample seeded with 2 pM of  $\alpha$ -synuclein WT as function of incubation time. The experiments were performed at  $V= 500$  mV in NaCl 1M, PBS 1X ph 7.4, using (a) nanopipette N° 21, (b) nanopipette N°22 and (c) nanopipette N°23
